# Supplementary material
Source: PubMed Central journal article supplement (PMC7004871)
Supplement: NIHMS1535166-supplement-Supplemental_Data_File__doc__pdf__etc___1.pdf [file NIHMS1535166-supplement-Supplemental_Data_File__doc__pdf__etc___1.pdf]

**SDC 1.** List of study assessments describing their purpose, and references to method description.

| Category                         | Assessment                                                                                             | Purpose                                                 | Method or Instrument                        | Citation to Method                               |
|----------------------------------|--------------------------------------------------------------------------------------------------------|---------------------------------------------------------|---------------------------------------------|--------------------------------------------------|
| Demographics                     | Gender                                                                                                 | Covariate or confounding factor                         | Self-report                                 |                                                  |
|                                  | Age                                                                                                    | Covariate or confounding factor                         | Self-report                                 |                                                  |
|                                  | Race                                                                                                   | Covariate or confounding factor                         | Self-report                                 |                                                  |
|                                  | Ethnicity                                                                                              | Covariate or confounding factor                         | Self-report                                 |                                                  |
|                                  | Place of birth                                                                                         | Covariate or confounding factor                         | Self-report                                 |                                                  |
|                                  | Marital status                                                                                         | Covariate or confounding factor                         | Self-report                                 |                                                  |
|                                  | Employment                                                                                             | Covariate or confounding factor                         | Self-report                                 |                                                  |
|                                  | Income                                                                                                 | Covariate or confounding factor                         | Self-report                                 |                                                  |
|                                  | Parents education                                                                                      | Covariate or confounding factor                         | Self-report                                 |                                                  |
| Health Endpoints and Biomarkers  | Weight                                                                                                 | To estimate BMI                                         |                                             |                                                  |
|                                  | Height                                                                                                 | To estimate BMI                                         |                                             |                                                  |
|                                  | Body mass index (BMI)                                                                                  | Risk factor                                             | CDC calculator                              |                                                  |
|                                  | Blood Pressure                                                                                         | Outcome                                                 | Oscillometric technique                     | Ogedegbe and Pickering (2010)                    |
|                                  | Lipid Profile (HDL/LDL/Glucose/TG)                                                                     | Risk factor                                             | Alere Cholestech LDX® Analyzer              | Rogers, Misner, Ockene, and Nicolosi (1993)      |
|                                  | Heart Rate Variability (HRV, high frequency, low frequency, very low frequency, pNN50, NN50 and SDDSD) | Outcome                                                 | Electrocardiography                         | Camm et al. (1996)                               |
|                                  | Carotid Intima-Media Thickness                                                                         | Outcome                                                 | Ultrasound                                  | Stein et al. (2008)                              |
|                                  | Depression Symptoms (M&F)                                                                              | Outcome                                                 | Moods and Feelings Instrument               | Angold et al. (1995).                            |
|                                  | Depression Severity (PHQ 9)                                                                            | Outcome                                                 | Patient Health Questionnaire (PHQ-9)        | Kroenke, Spitzer, and Williams (2001)            |
|                                  | IL-1 $\beta$ , CRP, IL-6, IL-8, and TNF- $\alpha$                                                      | Assess chronic inflammation and inflammatory reactivity | Multiplex Assay                             | duPont, Wang, Wadhwa, Culhane, and Nelson (2005) |
| Symptoms of Chemical sensitivity | Outcome                                                                                                | Symptoms Survey                                         | Black, Okiishi, Gabel, and Schlosser (1999) |                                                  |

| Category                     | Assessment                            | Purpose                                                                                                                            | Method or Instrument                                    | Citation to Method                       |                                            |
|------------------------------|---------------------------------------|------------------------------------------------------------------------------------------------------------------------------------|---------------------------------------------------------|------------------------------------------|--------------------------------------------|
|                              | Stress reactivity                     | Mediator                                                                                                                           | Trier Social Stress Triggers                            | Kirschbaum, Pirke, and Hellhammer (1993) |                                            |
|                              | Stress responsivity                   | Mediator                                                                                                                           | LPS challenge                                           | Miller, Rohleder, and Stetler (2005)     |                                            |
| Life stress                  | Life stress exposure and severity     | Assess effect of stress exposure and severity by type of stressor (e.g., work, education, relationships) on health and performance | Stress and Adversity Inventory (STRAIN)                 | Slavich and Shields (2018)               |                                            |
| Behavior and Personal Traits | Diet                                  | The modifying effect of all variables in this category will on the stress-health/performance association will be assessed          | Self-report consumption by food category                | Felitti et al. (1998)                    |                                            |
|                              | Physical Activity                     |                                                                                                                                    | Self-report of engagement by activity type              |                                          |                                            |
|                              | Smoking                               |                                                                                                                                    | Self-report, current, ever, frequency                   |                                          |                                            |
|                              | Drug Use                              |                                                                                                                                    | Self-report, quantity and frequency                     |                                          |                                            |
|                              | Alcohol Consumption                   |                                                                                                                                    | Self-report, quantity and frequency                     |                                          |                                            |
|                              | Sleep quality                         |                                                                                                                                    | Self-report, duration, quality, and time to fall asleep |                                          |                                            |
|                              | Family health history and appraisal   |                                                                                                                                    | CDC questionnaires                                      |                                          |                                            |
|                              | Self-efficacy                         |                                                                                                                                    | Self-efficacy for Nursing Students Instrument           |                                          | Stump, Husman, and Bremet (2012)           |
|                              | Stress Coping Skills                  |                                                                                                                                    | Coping Strategies Inventory (CSI)                       |                                          | Tobin, Holroyd, Reynolds, and Wigal (1989) |
|                              | Demographic                           |                                                                                                                                    | Self-report                                             |                                          |                                            |
| Personality                  | Ten-Item Personality Inventory-(TIPI) | Gosling, Rentfrow, and Swann (2003).                                                                                               |                                                         |                                          |                                            |

| Category                     | Assessment                                                | Purpose                                                                                                                   | Method or Instrument                                | Citation to Method                                                                                                    |
|------------------------------|-----------------------------------------------------------|---------------------------------------------------------------------------------------------------------------------------|-----------------------------------------------------|-----------------------------------------------------------------------------------------------------------------------|
| Behavior and Personal Traits | Cognitive Ability                                         | The modifying effect of all variables in this category will on the stress-health/performance association will be assessed | Overclaiming technique                              | Paulhus and Harms (2004)                                                                                              |
|                              | Emotional Intelligence                                    |                                                                                                                           | Mayer-Salovey-Caruso Emotional Intelligence Test™   | Mayer, Salovey, Caruso, and Sitarenios (2003)                                                                         |
| Social Factors               | Childhood Adversity                                       | The modifying effect of all variables in this category will on the stress-health/performance association will be assessed | Adverse Childhood Experiences (ACE) Questionnaire   | Felitti et al. (1998)                                                                                                 |
|                              | SES                                                       |                                                                                                                           | Parent's educational attainment, household income   | Felitti et al. (1998)                                                                                                 |
|                              | Parental attachment                                       |                                                                                                                           | Inventory of Parent and Peer Attachment (IPPA)      | Mattanah, Lopez, and Govern (2011)                                                                                    |
|                              | Peer attachment                                           |                                                                                                                           | Inventory of Parent and Peer Attachment (IPPA)      | Mattanah, Lopez, and Govern (2011)                                                                                    |
|                              | Social Support                                            |                                                                                                                           | ENRICHD Social Support Inventory                    | Mitchell et al. (2003)                                                                                                |
| Engagement and Performance   | Burnout                                                   | Associations between burnout, performance, and engagement                                                                 | Maslach Burnout Inventory - Student Survey (MBI-SS) | Yavuz and Dogan (2014)                                                                                                |
|                              | Grade point average (GPA)                                 | Assess academic performance by semester and by course                                                                     | Student records                                     |                                                                                                                       |
|                              | NCLEX Scores                                              | Pass or fail of licensure exam                                                                                            | Student records                                     |                                                                                                                       |
| Environmental Exposure       | Chemical substances                                       |                                                                                                                           | Self-report survey                                  | Miller and Prihoda (1999)                                                                                             |
|                              | Personal products                                         |                                                                                                                           | Self-report survey                                  | Wu et al. (2010)                                                                                                      |
|                              | Metal exposure (e.g., serum levels of Al, As, Cd, Cu, Fe) |                                                                                                                           | ICPMS                                               | Centers for Disease Control and Prevention (2012); Funk, Pleil, Sauter, McDade and Holl (2015); Harkema et al. (2009) |
|                              | Greenness                                                 |                                                                                                                           | Satellite and Google® Streetview™ images            | Browning and Lee, (2017): Li, Deal, Zhou, Slavenas, and Sullivan, (2018)                                              |
