# Supplementary material
Source: PubMed Central journal article supplement (PMC7004871)
Supplement: NIHMS1535166-supplement-Supplemental_Data_File__doc__pdf__etc___2.pdf [file NIHMS1535166-supplement-Supplemental_Data_File__doc__pdf__etc___2.pdf]

**SDC 2. Descriptive statistics**

|                   | n   | mean   | sd    | median | trimmed | mad   | min    | max    | range  | skew  | kurtosis | se   |
|-------------------|-----|--------|-------|--------|---------|-------|--------|--------|--------|-------|----------|------|
| Age               | 436 | 25.15  | 6.25  | 23.00  | 23.99   | 2.97  | 18.00  | 60.00  | 42.00  | 2.07  | 5.35     | 0.30 |
| BMI               | 436 | 25.67  | 5.37  | 24.40  | 25.14   | 4.89  | 14.10  | 47.30  | 33.20  | 0.95  | 0.88     | 0.26 |
| Systolic BP       | 411 | 117.82 | 13.25 | 116.00 | 116.99  | 13.34 | 86.00  | 157.00 | 71.00  | 0.55  | -0.03    | 0.65 |
| Diastolic BP      | 411 | 72.85  | 9.94  | 71.00  | 72.27   | 10.38 | 54.00  | 109.00 | 55.00  | 0.53  | 0.00     | 0.49 |
| Total Cholesterol | 406 | 170.00 | 34.84 | 167.00 | 167.45  | 31.13 | 100.00 | 283.00 | 183.00 | 0.67  | 0.43     | 1.73 |
| HDL               | 405 | 54.04  | 15.53 | 53.00  | 53.80   | 16.31 | 8.00   | 95.00  | 87.00  | 0.13  | -0.30    | 0.77 |
| TRG               | 410 | 136.71 | 75.97 | 115.50 | 126.62  | 63.01 | 19.00  | 417.00 | 398.00 | 1.21  | 1.24     | 3.75 |
| LDL               | 385 | 89.49  | 32.21 | 86.00  | 87.60   | 32.62 | 20.00  | 197.00 | 177.00 | 0.53  | 0.14     | 1.64 |
| nonHDL            | 388 | 116.49 | 36.67 | 110.00 | 113.41  | 32.62 | 3.90   | 242.00 | 238.10 | 0.77  | 0.60     | 1.86 |
| LDLHDL            | 385 | 1.87   | 1.10  | 1.60   | 1.73    | 0.89  | 0.07   | 9.60   | 9.53   | 1.92  | 7.32     | 0.06 |
| Glucose           | 409 | 91.70  | 11.71 | 90.00  | 90.30   | 7.41  | 65.00  | 171.00 | 106.00 | 2.17  | 8.86     | 0.58 |
| A1c               | 138 | 5.32   | 0.85  | 5.20   | 5.21    | 0.15  | 4.70   | 13.11  | 8.41   | 6.89  | 53.98    | 0.07 |
| IL-1 $\beta$      | 408 | 1.08   | 1.09  | 0.90   | 0.89    | 0.40  | 0.18   | 13.56  | 13.38  | 6.06  | 52.72    | 0.05 |
| IL-6              | 407 | 3.32   | 3.47  | 2.30   | 2.76    | 1.76  | 0.17   | 38.77  | 38.60  | 4.86  | 37.03    | 0.17 |
| IL-8              | 408 | 5.46   | 3.58  | 4.73   | 4.99    | 1.98  | 1.15   | 41.06  | 39.91  | 5.41  | 42.93    | 0.18 |
| TNF $\alpha$      | 408 | 5.24   | 3.11  | 4.64   | 4.81    | 1.60  | 1.79   | 41.68  | 39.89  | 5.69  | 53.01    | 0.15 |
| CRP               | 340 | 0.20   | 0.34  | 0.09   | 0.12    | 0.10  | 0.00   | 2.83   | 2.83   | 4.34  | 24.40    | 0.02 |
| FA                | 340 | 2.80   | 0.92  | 2.70   | 2.72    | 0.67  | 1.23   | 13.22  | 11.99  | 4.74  | 47.54    | 0.05 |
| SAP               | 340 | 0.20   | 0.08  | 0.19   | 0.19    | 0.06  | 0.05   | 0.87   | 0.82   | 2.44  | 16.62    | 0.00 |
| CIMT              | 402 | 0.61   | 0.17  | 0.58   | 0.59    | 0.11  | 0.32   | 1.71   | 1.40   | 2.32  | 9.27     | 0.01 |
| WBC               | 67  | 7.04   | 1.90  | 6.62   | 6.90    | 1.66  | 3.98   | 12.61  | 8.63   | 0.69  | 0.12     | 0.23 |
| RBC               | 67  | 4.77   | 0.37  | 4.81   | 4.78    | 0.36  | 3.96   | 5.54   | 1.58   | -0.25 | -0.55    | 0.04 |
| Neutrophils       | 67  | 4.23   | 1.50  | 4.09   | 4.13    | 1.38  | 1.72   | 8.35   | 6.63   | 0.59  | -0.25    | 0.18 |
| Lymphocytes       | 67  | 2.13   | 0.63  | 1.99   | 2.10    | 0.61  | 1.10   | 3.79   | 2.69   | 0.45  | -0.67    | 0.08 |
| Monocytes         | 67  | 0.47   | 0.16  | 0.46   | 0.46    | 0.15  | 0.15   | 1.11   | 0.96   | 1.21  | 2.57     | 0.02 |
| Eosinophils       | 67  | 0.16   | 0.11  | 0.14   | 0.15    | 0.10  | 0.02   | 0.45   | 0.43   | 0.98  | 0.28     | 0.01 |
| Basophils         | 67  | 0.03   | 0.02  | 0.03   | 0.03    | 0.01  | 0.01   | 0.09   | 0.08   | 0.89  | 0.74     | 0.00 |
| PHQ9              | 410 | 6.42   | 5.23  | 5.00   | 5.64    | 4.45  | 1      | 31     | 30     | 1.41  | 2.12     | 0.26 |
| ACE               | 423 | 2      | 2     | 1      | 1.73    | 1.48  | 0      | 10     | 10     | 1.08  | 0.79     | 0.10 |
