# Supplementary material
Source: PubMed Central journal article supplement (PMC7004871)
Supplement: NIHMS1535166-supplement-Supplemental_Data_File__doc__pdf__etc___3.pdf [file NIHMS1535166-supplement-Supplemental_Data_File__doc__pdf__etc___3.pdf]

**SDC 3.** Descriptive statistics grouped by gender, ethnicity, employment status, and ACE score.

|                          |        | Gender |       |     |     | Ethnicity    |      |       |     | Employment |            |     |       | Childhood Adversity |      |           |     |       |     |     |
|--------------------------|--------|--------|-------|-----|-----|--------------|------|-------|-----|------------|------------|-----|-------|---------------------|------|-----------|-----|-------|-----|-----|
|                          |        | n      | mean  | sd  | se  | n            | mean | sd    | se  | n          | mean       | sd  | se    | n                   | mean | sd        | se  |       |     |     |
| <b>Age</b>               | Male   | 92     | 24.95 | 5.7 | 0.6 | Non-Hispanic | 45   | 28.24 | 7.4 | 1.1        | Unemployed | 290 | 25.09 | 6.5                 | 0.4  | ACE = 0   | 119 | 24.47 | 7.1 | 0.7 |
|                          | Female | 344    | 25.2  | 6.4 | 0.4 | Hispanic     | 391  | 24.79 | 6   | 0.3        | Employed   | 146 | 25.26 | 5.8                 | 0.5  | sACE >= 4 | 89  | 26.17 | 5.9 | 0.6 |
| <b>BMI</b>               | Male   | 92     | 25.89 | 3.8 | 0.4 | Non-Hispanic | 45   | 26.03 | 5.5 | 0.8        | Unemployed | 290 | 25.79 | 5.5                 | 0.3  | ACE = 0   | 119 | 25.84 | 5.9 | 0.5 |
|                          | Female | 344    | 25.61 | 5.7 | 0.3 | Hispanic     | 391  | 25.63 | 5.4 | 0.3        | Employed   | 146 | 25.42 | 5.1                 | 0.4  | sACE >= 4 | 89  | 26.24 | 5.7 | 0.6 |
| <b>Systolic BP</b>       | Male   | 83     | 129.4 | 13  | 1.4 | Non-Hispanic | 41   | 122.2 | 14  | 2.2        | Unemployed | 273 | 118.1 | 14                  | 0.8  | ACE = 0   | 114 | 117.4 | 14  | 1.3 |
|                          | Female | 328    | 114.9 | 12  | 0.6 | Hispanic     | 370  | 117.3 | 13  | 0.7        | Employed   | 138 | 117.3 | 12                  | 1    | sACE >= 4 | 86  | 117.9 | 12  | 1.3 |
| <b>Diastolic BP</b>      | Male   | 83     | 78.22 | 9.4 | 1   | Non-Hispanic | 41   | 75.41 | 9   | 1.4        | Unemployed | 273 | 72.79 | 9.9                 | 0.6  | ACE = 0   | 114 | 72.55 | 10  | 1   |
|                          | Female | 328    | 71.49 | 9.6 | 0.5 | Hispanic     | 370  | 72.56 | 10  | 0.5        | Employed   | 138 | 72.96 | 10                  | 0.9  | sACE >= 4 | 86  | 73.03 | 9.2 | 1   |
| <b>Total Cholesterol</b> | Male   | 81     | 173.7 | 37  | 4.1 | Non-Hispanic | 40   | 174.5 | 37  | 5.9        | Unemployed | 271 | 171.5 | 35                  | 2.1  | ACE = 0   | 113 | 173.7 | 37  | 3.5 |
|                          | Female | 325    | 169.1 | 34  | 1.9 | Hispanic     | 366  | 169.5 | 35  | 1.8        | Employed   | 135 | 167   | 35                  | 3    | sACE >= 4 | 84  | 169.8 | 35  | 3.8 |
| <b>HDL</b>               | Male   | 82     | 44.29 | 14  | 1.5 | Non-Hispanic | 40   | 52.95 | 17  | 2.6        | Unemployed | 268 | 53.6  | 15                  | 0.9  | ACE = 0   | 112 | 54.29 | 16  | 1.5 |
|                          | Female | 323    | 56.52 | 15  | 0.8 | Hispanic     | 365  | 54.16 | 15  | 0.8        | Employed   | 137 | 54.91 | 16                  | 1.4  | sACE >= 4 | 85  | 52.4  | 15  | 1.6 |
| <b>TRG</b>               | Male   | 82     | 143   | 79  | 8.7 | Non-Hispanic | 41   | 139.8 | 89  | 14         | Unemployed | 273 | 138.8 | 79                  | 4.8  | ACE = 0   | 113 | 151.8 | 83  | 7.8 |
|                          | Female | 328    | 135.1 | 75  | 4.2 | Hispanic     | 369  | 136.4 | 75  | 3.9        | Employed   | 137 | 132.6 | 71                  | 6    | sACE >= 4 | 86  | 122.1 | 64  | 6.9 |
| <b>LDL</b>               | Male   | 76     | 101.8 | 34  | 3.9 | Non-Hispanic | 37   | 92.92 | 34  | 5.5        | Unemployed | 261 | 90.01 | 33                  | 2    | ACE = 0   | 107 | 89.91 | 31  | 3   |
|                          | Female | 309    | 86.46 | 31  | 1.8 | Hispanic     | 348  | 89.13 | 32  | 1.7        | Employed   | 124 | 88.4  | 31                  | 2.8  | sACE >= 4 | 83  | 93.28 | 31  | 3.4 |
| <b>nonHDL</b>            | Male   | 78     | 130.2 | 37  | 4.2 | Non-Hispanic | 38   | 117.9 | 44  | 7.1        | Unemployed | 264 | 117.1 | 37                  | 2.3  | ACE = 0   | 109 | 119.4 | 38  | 3.7 |
|                          | Female | 310    | 113   | 36  | 2   | Hispanic     | 350  | 116.3 | 36  | 1.9        | Employed   | 124 | 115.2 | 36                  | 3.2  | sACE >= 4 | 83  | 117.6 | 39  | 4.2 |
| <b>LDLHDL</b>            | Male   | 77     | 2.59  | 1.5 | 0.2 | Non-Hispanic | 37   | 2.09  | 1.6 | 0.3        | Unemployed | 261 | 1.91  | 1.2                 | 0.1  | ACE = 0   | 108 | 1.87  | 1   | 0.1 |
|                          | Female | 308    | 1.69  | 0.9 | 0.1 | Hispanic     | 348  | 1.85  | 1   | 0.1        | Employed   | 124 | 1.78  | 1                   | 0.1  | sACE >= 4 | 82  | 1.97  | 1   | 0.1 |
| <b>Glucose</b>           | Male   | 83     | 96.28 | 15  | 1.7 | Non-Hispanic | 40   | 93.08 | 16  | 2.5        | Unemployed | 271 | 91.61 | 12                  | 0.7  | ACE = 0   | 113 | 91.58 | 12  | 1.2 |
|                          | Female | 326    | 90.54 | 10  | 0.6 | Hispanic     | 369  | 91.55 | 11  | 0.6        | Employed   | 138 | 91.89 | 11                  | 1    | sACE >= 4 | 86  | 92.33 | 11  | 1.2 |
| <b>A1c</b>               | Male   | 19     | 5.47  | 0.9 | 0.2 | Non-Hispanic | 12   | 5.88  | 2.3 | 0.7        | Unemployed | 101 | 5.3   | 0.8                 | 0.1  | ACE = 0   | 41  | 5.44  | 1.3 | 0.2 |
|                          | Female | 119    | 5.29  | 0.8 | 0.1 | Hispanic     | 126  | 5.27  | 0.6 | 0.1        | Employed   | 37  | 5.38  | 1                   | 0.2  | sACE >= 4 | 28  | 5.2   | 0.2 | 0   |
| <b>IL-1β</b>             | Male   | 84     | 0.94  | 1   | 0.1 | Non-Hispanic | 41   | 1.13  | 0.8 | 0.1        | Unemployed | 270 | 1.08  | 1                   | 0.1  | ACE = 0   | 114 | 1.08  | 0.9 | 0.1 |
|                          | Female | 324    | 1.12  | 1.1 | 0.1 | Hispanic     | 367  | 1.08  | 1.1 | 0.1        | Employed   | 138 | 1.09  | 1.2                 | 0.1  | sACE >= 4 | 84  | 1     | 0.6 | 0.1 |
| <b>IL-6</b>              | Male   | 83     | 3.86  | 5.4 | 0.6 | Non-Hispanic | 40   | 3.34  | 2.9 | 0.5        | Unemployed | 269 | 3.3   | 3.3                 | 0.2  | ACE = 0   | 114 | 3.27  | 2.7 | 0.3 |
|                          | Female | 324    | 3.18  | 2.7 | 0.2 | Hispanic     | 367  | 3.32  | 3.5 | 0.2        | Employed   | 138 | 3.36  | 3.8                 | 0.3  | sACE >= 4 | 83  | 3.71  | 4.7 | 0.5 |
| <b>IL-8</b>              | Male   | 84     | 5.97  | 6.3 | 0.7 | Non-Hispanic | 41   | 5.46  | 2.8 | 0.4        | Unemployed | 270 | 5.36  | 3.1                 | 0.2  | ACE = 0   | 114 | 5.05  | 2.2 | 0.2 |
|                          | Female | 324    | 5.33  | 2.4 | 0.1 | Hispanic     | 367  | 5.46  | 3.7 | 0.2        | Employed   | 138 | 5.66  | 4.4                 | 0.4  | sACE >= 4 | 84  | 6.19  | 5.6 | 0.6 |
| <b>TNFα</b>              | Male   | 84     | 6.02  | 4.9 | 0.5 | Non-Hispanic | 41   | 4.88  | 2   | 0.3        | Unemployed | 270 | 5.19  | 2.5                 | 0.2  | ACE = 0   | 114 | 5.1   | 2.2 | 0.2 |
|                          | Female | 324    | 5.04  | 2.4 | 0.1 | Hispanic     | 367  | 5.28  | 3.2 | 0.2        | Employed   | 138 | 5.34  | 4.1                 | 0.4  | sACE >= 4 | 84  | 5.17  | 2.4 | 0.3 |
| <b>CRP</b>               | Male   | 76     | 0.17  | 0.3 | 0   | Non-Hispanic | 36   | 0.15  | 0.2 | 0          | Unemployed | 221 | 0.22  | 0.4                 | 0    | ACE = 0   | 91  | 0.2   | 0.4 | 0   |
|                          | Female | 264    | 0.21  | 0.4 | 0   | Hispanic     | 304  | 0.2   | 0.4 | 0          | Employed   | 119 | 0.16  | 0.2                 | 0    | sACE >= 4 | 69  | 0.24  | 0.4 | 0.1 |
| <b>FA</b>                | Male   | 76     | 2.85  | 0.8 | 0.1 | Non-Hispanic | 36   | 2.68  | 0.7 | 0.1        | Unemployed | 221 | 2.79  | 1                   | 0.1  | ACE = 0   | 91  | 2.83  | 0.8 | 0.1 |

|                    |        |     |      |     |     |              |     |      |     |     |            |     |      |     |     |           |     |      |     |     |
|--------------------|--------|-----|------|-----|-----|--------------|-----|------|-----|-----|------------|-----|------|-----|-----|-----------|-----|------|-----|-----|
| <b>SAP</b>         | Female | 264 | 2.79 | 1   | 0.1 | Hispanic     | 304 | 2.82 | 0.9 | 0.1 | Employed   | 119 | 2.82 | 0.7 | 0.1 | sACE >= 4 | 69  | 2.8  | 0.7 | 0.1 |
|                    | Male   | 76  | 0.22 | 0.1 | 0   | Non-Hispanic | 36  | 0.2  | 0.1 | 0   | Unemployed | 221 | 0.2  | 0.1 | 0   | ACE = 0   | 91  | 0.2  | 0.1 | 0   |
| <b>CIMT</b>        | Female | 264 | 0.19 | 0.1 | 0   | Hispanic     | 304 | 0.2  | 0.1 | 0   | Employed   | 119 | 0.2  | 0.1 | 0   | sACE >= 4 | 69  | 0.2  | 0.1 | 0   |
|                    | Male   | 82  | 0.61 | 0.2 | 0   | Non-Hispanic | 41  | 0.63 | 0.1 | 0   | Unemployed | 267 | 0.62 | 0.2 | 0   | ACE = 0   | 111 | 0.61 | 0.2 | 0   |
| <b>WBC</b>         | Female | 320 | 0.61 | 0.2 | 0   | Hispanic     | 361 | 0.61 | 0.2 | 0   | Employed   | 135 | 0.6  | 0.2 | 0   | sACE >= 4 | 82  | 0.61 | 0.2 | 0   |
|                    | Male   | 7   | 5.58 | 0.9 | 0.4 | Non-Hispanic | 5   | 6.43 | 1.5 | 0.7 | Unemployed | 48  | 7.28 | 2   | 0.3 | ACE = 0   | 22  | 7.26 | 1.9 | 0.4 |
| <b>RBC</b>         | Female | 60  | 7.21 | 1.9 | 0.3 | Hispanic     | 62  | 7.09 | 1.9 | 0.3 | Employed   | 19  | 6.43 | 1.6 | 0.4 | sACE >= 4 | 15  | 6.03 | 1.5 | 0.4 |
|                    | Male   | 7   | 5.24 | 0.2 | 0.1 | Non-Hispanic | 5   | 4.79 | 0.5 | 0.2 | Unemployed | 48  | 4.79 | 0.4 | 0.1 | ACE = 0   | 22  | 4.79 | 0.3 | 0.1 |
| <b>Neutrophils</b> | Female | 60  | 4.71 | 0.3 | 0   | Hispanic     | 62  | 4.77 | 0.4 | 0.1 | Employed   | 19  | 4.71 | 0.4 | 0.1 | sACE >= 4 | 15  | 4.57 | 0.4 | 0.1 |
|                    | Male   | 7   | 2.99 | 0.7 | 0.3 | Non-Hispanic | 5   | 3.69 | 1.1 | 0.5 | Unemployed | 48  | 4.44 | 1.5 | 0.2 | ACE = 0   | 22  | 4.35 | 1.4 | 0.3 |
| <b>Lymphocytes</b> | Female | 60  | 4.37 | 1.5 | 0.2 | Hispanic     | 62  | 4.27 | 1.5 | 0.2 | Employed   | 19  | 3.7  | 1.3 | 0.3 | sACE >= 4 | 15  | 3.5  | 1.2 | 0.3 |
|                    | Male   | 7   | 2    | 0.4 | 0.2 | Non-Hispanic | 5   | 2.19 | 0.5 | 0.2 | Unemployed | 48  | 2.16 | 0.7 | 0.1 | ACE = 0   | 22  | 2.19 | 0.7 | 0.1 |
| <b>Monocytes</b>   | Female | 60  | 2.15 | 0.7 | 0.1 | Hispanic     | 62  | 2.13 | 0.6 | 0.1 | Employed   | 19  | 2.05 | 0.5 | 0.1 | sACE >= 4 | 15  | 1.96 | 0.5 | 0.1 |
|                    | Male   | 7   | 0.37 | 0.1 | 0   | Non-Hispanic | 5   | 0.38 | 0.1 | 0   | Unemployed | 48  | 0.48 | 0.2 | 0   | ACE = 0   | 22  | 0.51 | 0.2 | 0   |
| <b>Eosinophils</b> | Female | 60  | 0.49 | 0.2 | 0   | Hispanic     | 62  | 0.48 | 0.2 | 0   | Employed   | 19  | 0.46 | 0.1 | 0   | sACE >= 4 | 15  | 0.38 | 0.1 | 0   |
|                    | Male   | 7   | 0.18 | 0.1 | 0   | Non-Hispanic | 5   | 0.12 | 0.1 | 0   | Unemployed | 48  | 0.16 | 0.1 | 0   | ACE = 0   | 22  | 0.16 | 0.1 | 0   |
| <b>Basophils</b>   | Female | 60  | 0.16 | 0.1 | 0   | Hispanic     | 62  | 0.16 | 0.1 | 0   | Employed   | 19  | 0.16 | 0.1 | 0   | sACE >= 4 | 15  | 0.15 | 0.1 | 0   |
|                    | Male   | 7   | 0.04 | 0   | 0   | Non-Hispanic | 5   | 0.04 | 0   | 0   | Unemployed | 48  | 0.03 | 0   | 0   | ACE = 0   | 22  | 0.04 | 0   | 0   |
| <b>PHQ9</b>        | Female | 60  | 0.03 | 0   | 0   | Hispanic     | 62  | 0.03 | 0   | 0   | Employed   | 19  | 0.04 | 0   | 0   | sACE >= 4 | 15  | 0.03 | 0   | 0   |
|                    | Male   | 85  | 5.46 | 5   | 0.5 | Non-Hispanic | 42  | 6.4  | 5.1 | 0.8 | Unemployed | 274 | 6.57 | 5.4 | 0.3 | ACE = 0   | 114 | 4.84 | 3.7 | 0.4 |
| <b>ACE</b>         | Female | 325 | 6.67 | 5.3 | 0.3 | Hispanic     | 368 | 6.42 | 5.3 | 0.3 | Employed   | 136 | 6.13 | 4.9 | 0.4 | sACE >= 4 | 88  | 9.19 | 6.9 | 0.7 |
|                    | Male   | 88  | 1.78 | 2   | 0.2 | Non-Hispanic | 44  | 2.18 | 2   | 0.3 | Unemployed | 283 | 1.94 | 2.1 | 0.1 | ACE = 0   | 119 | 0    | 0   | 0   |
|                    | Female | 335 | 2.06 | 2   | 0.1 | Hispanic     | 379 | 1.98 | 2   | 0.1 | Employed   | 140 | 2.12 | 1.9 | 0.2 | sACE >= 4 | 89  | 5.19 | 1.3 | 0.1 |
