# Supplementary material
Source: PubMed Central journal article supplement (PMC7004871)
Supplement: NIHMS1535166-supplement-Supplemental_Data_File__doc__pdf__etc___4.pdf [file NIHMS1535166-supplement-Supplemental_Data_File__doc__pdf__etc___4.pdf]

**Table 1.** Summary of results from analyses of covariance for standardized biomarker levels by life stressor type and other selected factors controlled for age and gender.

| Factor                 | Dimension                   | Level     | n   | IL-1β         | IL-6           | IL-8           | TNFα           | CRP          | FA            | SAP             | CIMT            | WBC            | RBC              | Neutrophils    | Lymphocytes    | Monocytes       | Eosinophils  | Basophils      |
|------------------------|-----------------------------|-----------|-----|---------------|----------------|----------------|----------------|--------------|---------------|-----------------|-----------------|----------------|------------------|----------------|----------------|-----------------|--------------|----------------|
|                        |                             |           |     | M(SD)         | M(SD)          | M(SD)          | M(SD)          | M(SD)        | M(SD)         | M(SD)           | M(SD)           | M(SD)          | M(SD)            | M(SD)          | M(SD)          | M(SD)           | M(SD)        | M(SD)          |
| Gender                 | Male                        |           | 84  | -0.24 (1.03)  | 0.05 (1.18)    | -0.03 (1.33)   | 0.24 (1.16)    | -0.13 (0.96) | 0.07 (0.99)   | 0.32 (1.00)     | 0.01 (0.97)     | -0.34 (1.01)   | 1.38 (0.62)      | -0.32 (0.96)   | -0.19 (1.06)   | -0.19 (0.97)    | -0.12 (0.79) | 0.04 (1.00)    |
|                        | Female                      |           | 324 | 0.06 (0.98) * | -0.01 (0.95)   | 0.01 (0.90)    | -0.06 (0.95) * | 0.04 (1.01)  | -0.02 (1.00)  | -0.09 (0.98) ** | 0.00 (1.01)     | 0.07 (0.99) †  | -0.30 (0.80) *** | 0.07 (1.00) †  | 0.04 (0.99)    | 0.04 (1.01)     | 0.03 (1.04)  | -0.01 (1.00)   |
| Ethnicity              | Non-Hispanic                |           | 41  | 0.13 (0.94)   | 0.00 (1.08)    | 0.03 (0.98)    | -0.12 (0.94)   | -0.15 (0.78) | -0.15 (0.93)  | 0.00 (1.10)     | 0.14 (0.75)     | -0.44 (0.81)   | 0.16 (1.33)      | -0.45 (0.85)   | -0.04 (0.83)   | -0.52 (0.92)    | -0.37 (0.54) | 0.25 (1.21)    |
|                        | Hispanic                    |           | 367 | -0.01 (1.01)  | 0.00 (0.99)    | 0.00 (1.00)    | 0.01 (1.01)    | 0.02 (1.02)  | 0.02 (1.01)   | 0.00 (0.99)     | -0.02 (1.02)    | 0.05 (1.01) †  | -0.02 (0.96)     | 0.05 (1.01) †  | 0.01 (1.02)    | 0.06 (1.00) *   | 0.04 (1.03)  | -0.03 (0.98)   |
| Childhood Adversity    | ACE = 0                     |           | 114 | 0.02 (0.97)   | 0.01 (0.98)    | -0.11 (0.92)   | -0.01 (0.89)   | -0.03 (1.13) | 0.05 (0.96)   | -0.04 (1.02)    | 0.02 (0.93)     | 0.15 (0.91)    | 0.06 (0.87)      | -0.01 (1.00)   | -0.01 (1.00)   | 0.25 (1.01)     | 0.06 (1.18)  | -0.07 (1.08)   |
|                        | sACE ≥ 4                    |           | 84  | -0.05 (0.86)  | 0.10 (1.05)    | 0.15 (1.19) †  | 0.01 (0.93)    | 0.14 (1.17)  | 0.01 (0.99)   | 0.02 (0.95)     | 0.02 (0.98)     | -0.29 (0.97) † | -0.43 (1.03) **  | -0.28 (0.94) † | -0.05 (1.03)   | -0.41 (0.83) ** | -0.18 (0.90) | -0.33 (0.86)   |
| Life Stress (Exposure) | Total Count                 | Low (BT)  | 108 | -0.05 (0.88)  | 0.06 (0.92)    | -0.15 (0.86)   | -0.02 (1.01)   | -0.03 (1.15) | -0.10 (0.93)  | -0.01 (0.96)    | -0.10 (0.86)    | 0.05 (1.01)    | 0.25 (0.95)      | 0.07 (0.93)    | -0.03 (1.06)   | 0.22 (1.24)     | -0.03 (1.02) | -0.06 (0.97)   |
|                        |                             | High (TT) | 104 | -0.08 (0.84)  | 0.11 (0.94)    | 0.13 (1.10) *  | 0.07 (0.88)    | -0.02 (0.89) | 0.04 (0.97)   | -0.15 (0.86)    | 0.09 (0.98)     | -0.01 (0.83)   | -0.34 (0.99) **  | -0.02 (0.84)   | 0.04 (0.83)    | -0.07 (0.82)    | 0.17 (0.96)  | 0.16 (0.97)    |
|                        | Adult                       | Low (BT)  | 108 | 0.06 (1.05)   | 0.11 (0.98)    | -0.06 (0.89)   | 0.17 (1.09)    | 0.17 (1.16)  | 0.06 (1.00)   | -0.02 (0.95)    | 0.12 (1.15)     | 0.14 (0.89)    | 0.27 (0.94)      | 0.15 (0.87)    | 0.07 (0.86)    | 0.19 (1.18)     | -0.07 (1.05) | 0.00 (0.98)    |
|                        |                             | High (TT) | 104 | -0.01 (0.95)  | 0.06 (0.97)    | 0.14 (1.05)    | 0.04 (0.98)    | -0.02 (0.96) | 0.12 (1.16)   | 0.02 (1.19)     | 0.02 (0.97)     | -0.08 (0.86)   | -0.24 (1.00) **  | -0.10 (0.85)   | 0.02 (0.89)    | 0.05 (0.94)     | 0.05 (0.97)  | 0.10 (0.98)    |
|                        | Early Life                  | Low (BT)  | 105 | -0.01 (0.89)  | 0.07 (0.94)    | -0.10 (0.91)   | 0.04 (0.99)    | -0.16 (0.92) | -0.01 (1.13)  | 0.03 (1.19)     | -0.18 (0.85)    | 0.03 (0.96)    | 0.27 (0.87)      | 0.04 (1.07)    | 0.12 (1.09)    | -0.22 (0.77)    | -0.08 (0.74) |                |
|                        |                             | High (TT) | 106 | -0.05 (0.87)  | 0.09 (1.02)    | 0.16 (1.11) †  | 0.10 (0.89)    | 0.07 (0.98)  | 0.06 (0.94)   | -0.11 (0.85)    | 0.07 (1.00) *   | 0.04 (0.88)    | -0.18 (0.97) *   | 0.01 (0.93)    | 0.09 (0.84)    | 0.00 (0.72)     | 0.11 (0.97)  | 0.21 (0.96)    |
|                        | Domains Housing             | Low (BT)  | 107 | 0.10 (1.19)   | 0.14 (0.94)    | -0.07 (0.95)   | 0.20 (1.12)    | 0.00 (1.15)  | -0.01 (1.01)  | -0.11 (0.96)    | -0.24 (0.76)    | 0.01 (1.00)    | 0.89 (1.20)      | -0.10 (1.09)   | 0.27 (0.98)    | -0.21 (1.39)    | 0.02 (1.04)  | 0.58 (0.77)    |
|                        |                             | High (TT) | 106 | -0.07 (0.89)  | -0.11 (0.94) † | -0.02 (1.01)   | -0.05 (0.79) † | -0.04 (0.83) | 0.09 (1.13)   | 0.02 (1.20)     | 0.19 (1.18) **  | -0.03 (0.86)   | -0.18 (0.86) *** | -0.05 (0.88)   | 0.01 (0.87)    | 0.02 (0.88)     | 0.06 (1.02)  | 0.06 (0.84) †  |
|                        | Education                   | Low (BT)  | 107 | 0.09 (1.16)   | 0.14 (1.03)    | 0.20 (1.14)    | 0.39 (1.04)    | -0.19 (0.69) | -0.03 (0.96)  | -0.26 (0.83)    | -0.29 (0.84)    | 0.37 (1.17)    | 0.62 (1.34)      | 0.21 (1.30)    | 0.44 (1.25)    | 0.16 (1.71)     | 0.29 (1.00)  | 0.34 (0.71)    |
|                        |                             | High (TT) | 104 | 0.08 (0.82)   | -0.11 (0.95) † | 0.00 (0.83)    | 0.10 (0.92) *  | -0.04 (0.97) | -0.25 (0.92)  | -0.17 (0.87)    | 0.15 (1.22) **  | 0.10 (0.95)    | -0.05 (0.91) †   | 0.04 (0.98)    | 0.13 (0.93)    | 0.20 (1.03)     | 0.15 (0.94)  | 0.03 (1.11)    |
| Core-Characteristics   | Work                        | Low (BT)  | 108 | 0.00 (1.01)   | 0.12 (0.98)    | -0.10 (0.99)   | 0.18 (1.06)    | -0.05 (1.13) | -0.02 (0.91)  | -0.10 (0.95)    | -0.24 (0.94)    | 0.16 (1.00)    | 0.60 (1.13)      | 0.08 (1.09)    | 0.20 (1.07)    | -0.09 (1.47)    | 0.20 (1.06)  | 0.63 (0.56)    |
|                        |                             | High (TT) | 104 | -0.20 (0.82)  | -0.05 (0.99)   | 0.03 (1.12)    | -0.06 (0.93) † | 0.11 (0.86)  | 0.19 (1.20)   | 0.22 (1.21) *   | 0.20 (1.09) **  | -0.10 (1.03)   | 0.04 (1.15) †    | -0.10 (0.99)   | 0.03 (0.91)    | -0.15 (0.83)    | -0.01 (1.03) | 0.04 (1.03)    |
|                        | Treatment/Health            | Low (BT)  | 107 | 0.02 (0.98)   | 0.13 (0.92)    | 0.05 (1.02)    | -0.02 (0.99)   | -0.08 (0.94) | -0.01 (0.94)  | 0.01 (0.99)     | -0.06 (0.93)    | -0.33 (0.90)   | 0.21 (1.14)      | -0.22 (0.90)   | -0.40 (0.80)   | 0.03 (0.99)     | -0.23 (0.84) | -0.25 (0.70)   |
|                        |                             | High (TT) | 106 | -0.02 (0.94)  | 0.10 (0.98)    | 0.03 (1.10)    | 0.09 (0.93)    | 0.08 (0.92)  | 0.15 (1.16)   | 0.10 (1.12)     | 0.11 (1.08)     | 0.19 (0.88) *  | -0.01 (1.03)     | 0.12 (0.96)    | 0.25 (0.78) ** | -0.01 (1.04)    | 0.18 (0.98)  | 0.41 (1.15) *  |
|                        | Marital/Partner             | Low (BT)  | 107 | -0.05 (0.91)  | 0.02 (0.97)    | -0.09 (0.94)   | 0.10 (1.12)    | -0.11 (0.97) | -0.03 (0.92)  | -0.14 (0.94)    | -0.09 (1.01)    | -0.10 (0.89)   | 0.19 (0.90)      | -0.09 (0.91)   | -0.09 (0.89)   | -0.03 (1.20)    | 0.04 (0.91)  | 0.10 (1.08)    |
|                        |                             | High (TT) | 106 | -0.06 (0.89)  | -0.08 (0.85)   | -0.09 (0.83)   | 0.03 (0.81)    | 0.00 (1.09)  | 0.03 (0.95)   | -0.20 (0.87)    | 0.07 (1.17)     | 0.00 (0.94)    | -0.36 (0.90) **  | -0.01 (0.93)   | 0.00 (0.98)    | 0.06 (0.82)     | 0.12 (0.91)  | 0.04 (0.88)    |
|                        | Reproductive                | Low (BT)  | 107 | 0.10 (1.17)   | 0.14 (1.04)    | 0.23 (1.14)    | 0.36 (1.06)    | -0.20 (0.71) | -0.05 (0.88)  | -0.25 (0.81)    | -0.38 (0.64)    | 0.37 (1.17)    | 0.62 (1.34)      | 0.21 (1.30)    | 0.44 (1.25)    | 0.16 (1.71)     | 0.29 (1.00)  | 0.34 (0.71)    |
|                        |                             | High (TT) | 103 | 0.15 (0.90)   | -0.11 (0.99) † | 0.02 (0.85)    | 0.15 (0.92)    | -0.14 (0.83) | -0.28 (1.03)  | -0.27 (0.84)    | 0.20 (1.24) *** | 0.10 (0.94)    | 0.03 (0.90) †    | 0.06 (0.98)    | 0.10 (0.93)    | 0.13 (1.03)     | 0.14 (0.97)  | 0.04 (1.12)    |
|                        | Financial                   | Low (BT)  | 106 | -0.16 (0.85)  | 0.03 (0.88)    | -0.16 (0.87)   | -0.01 (0.90)   | 0.05 (1.16)  | 0.04 (0.98)   | -0.01 (0.96)    | -0.21 (0.73)    | -0.14 (1.01)   | 0.80 (1.04)      | -0.27 (1.01)   | 0.27 (0.99)    | -0.19 (1.24)    | 0.01 (0.95)  | 0.44 (0.78)    |
|                        |                             | High (TT) | 106 | 0.15 (1.17) * | 0.23 (1.09)    | 0.17 (1.23) *  | 0.16 (1.08)    | 0.03 (0.93)  | 0.01 (0.99)   | -0.04 (0.89)    | 0.13 (1.08) **  | -0.06 (1.00)   | -0.10 (0.97) *** | -0.09 (0.86)   | -0.01 (0.95)   | 0.22 (1.14)     | 0.11 (0.97)  |                |
|                        | Legal                       | Low (BT)  | 106 | 0.09 (1.12)   | 0.09 (0.99)    | 0.12 (1.02)    | 0.30 (0.91)    | -0.18 (0.70) | -0.05 (0.92)  | -0.25 (0.87)    | -0.32 (0.85)    | 0.16 (1.20)    | 0.57 (1.23)      | 0.06 (1.26)    | 0.26 (1.24)    | 0.12 (1.57)     | 0.13 (1.02)  | 0.34 (0.65)    |
|                        |                             | High (TT) | 105 | 0.03 (0.90)   | -0.12 (0.99)   | 0.03 (0.97)    | 0.17 (1.06)    | -0.06 (0.95) | -0.10 (1.05)  | -0.25 (0.78)    | 0.22 (1.23) *** | 0.09 (0.98)    | 0.03 (0.93) †    | 0.05 (1.00)    | 0.10 (0.95)    | 0.14 (1.02)     | 0.13 (0.97)  | -0.03 (1.12)   |
|                        | Relationships               | Low (BT)  | 105 | 0.05 (1.07)   | 0.04 (0.97)    | -0.08 (0.92)   | 0.07 (1.02)    | 0.11 (1.13)  | 0.07 (1.20)   | 0.13 (1.20)     | -0.07 (0.87)    | 0.03 (0.97)    | 0.24 (0.90)      | 0.06 (0.97)    | -0.03 (0.80)   | 0.12 (1.15)     | -0.16 (1.00) | 0.04 (0.92)    |
|                        |                             | High (TT) | 105 | -0.04 (0.89)  | 0.06 (1.02)    | 0.10 (0.97)    | 0.03 (0.84)    | 0.09 (1.10)  | 0.02 (0.88)   | 0.04 (0.87)     | 0.11 (1.00)     | 0.02 (0.81)    | 0.01 (1.11)      | -0.01 (0.88)   | 0.09 (0.72)    | -0.11 (0.80)    | 0.21 (1.12)  | 0.21 (1.04)    |
|                        | Death                       | Low (BT)  | 108 | 0.07 (1.04)   | -0.04 (0.95)   | -0.04 (1.02)   | 0.05 (0.99)    | -0.10 (1.00) | -0.04 (0.75)  | -0.13 (0.89)    | -0.06 (1.03)    | -0.43 (0.80)   | 0.10 (1.17)      | -0.38 (0.81)   | -0.32 (0.97)   | -0.19 (1.15)    | -0.21 (1.02) | -0.12 (0.98)   |
|                        |                             | High (TT) | 102 | -0.01 (1.06)  | 0.12 (1.09)    | 0.05 (1.06)    | 0.06 (1.07)    | 0.11 (0.91)  | 0.15 (1.25)   | 0.25 (1.21) *   | 0.01 (0.88)     | -0.10 (0.88)   | 0.05 (0.94)      | -0.16 (0.97)   | 0.04 (0.86)    | -0.04 (0.70)    | -0.03 (0.98) | 0.07 (0.98)    |
|                        | Life Threatening Situations | Low (BT)  | 108 | -0.15 (0.85)  | 0.08 (0.90)    | -0.13 (0.93)   | -0.05 (0.99)   | 0.05 (1.13)  | 0.13 (1.13)   | 0.14 (1.16)     | -0.07 (0.85)    | -0.09 (1.08)   | 0.39 (1.12)      | -0.11 (1.04)   | 0.01 (0.98)    | 0.01 (1.05)     | -0.01 (1.16) | 0.05 (0.69)    |
|                        |                             | High (TT) | 105 | 0.01 (1.12)   | 0.03 (1.05)    | 0.16 (1.19) *  | 0.19 (1.04) †  | -0.08 (0.86) | 0.01 (0.92)   | -0.13 (0.88) †  | -0.11 (0.91)    | 0.00 (0.84)    | -0.06 (0.99) *   | -0.04 (0.93)   | 0.00 (0.83)    | 0.06 (0.71)     | 0.21 (1.08)  | 0.27 (0.94)    |
|                        | Possessions                 | Low (BT)  | 107 | 0.07 (1.14)   | 0.10 (1.01)    | 0.19 (1.13)    | 0.33 (1.04)    | -0.18 (0.71) | 0.04 (0.93)   | -0.28 (0.88)    | -0.30 (0.86)    | -0.15 (0.95)   | 0.43 (1.29)      | -0.19 (1.17)   | -0.07 (0.97)   | -0.13 (1.56)    | -0.10 (0.90) | 0.34 (0.71)    |
|                        |                             | High (TT) | 103 | 0.04 (0.89)   | -0.12 (0.94)   | -0.04 (0.85) † | 0.08 (0.89) †  | 0.02 (1.16)  | -0.17 (0.98)  | -0.03 (0.92) †  | 0.20 (1.20) *** | 0.12 (0.98)    | -0.02 (0.89)     | 0.07 (1.01)    | 0.13 (0.97)    | 0.17 (1.04)     | 0.17 (0.98)  | 0.01 (1.11)    |
| Core-Characteristics   | Interpersonal               | Low (BT)  | 108 | -0.01 (0.94)  | -0.05 (0.95)   | -0.10 (0.83)   | 0.07 (1.04)    | -0.06 (1.07) | -0.06 (0.84)  | -0.13 (0.99)    | -0.04 (1.03)    | 0.11 (0.93)    | 0.38 (0.85)      | 0.09 (0.91)    | 0.11 (1.01)    | 0.10 (1.22)     | 0.08 (1.05)  | -0.06 (1.00)   |
|                        |                             | High (TT) | 101 | -0.05 (0.93)  | 0.04 (1.04)    | 0.09 (1.05)    | 0.07 (1.02)    | 0.01 (0.90)  | 0.06 (1.01)   | -0.10 (0.93)    | -0.02 (0.85)    | 0.14 (0.87)    | 0.03 (1.12) †    | 0.08 (0.99)    | 0.11 (0.88)    | 0.14 (0.87)     | 0.16 (1.07)  | 0.23 (0.97)    |
|                        | Danger                      | Low (BT)  | 108 | -0.04 (1.06)  | -0.01 (0.97)   | -0.12 (0.91)   | 0.09 (1.03)    | -0.09 (0.88) | -0.01 (0.97)  | 0.04 (0.95)     | -0.09 (0.96)    | -0.07 (1.06)   | 0.38 (1.09)      | -0.11 (1.07)   | 0.01 (0.94)    | 0.22 (1.00)     | -0.14 (1.00) | -0.32 (0.88)   |
|                        |                             | High (TT) | 104 | -0.06 (0.76)  | 0.01 (0.95)    | 0.10 (1.11)    | 0.05 (0.85)    | 0.05 (0.95)  | 0.14 (1.22)   | 0.03 (1.25)     | 0.12 (1.14)     | 0.10 (0.82)    | -0.18 (0.87) **  | 0.06 (0.81)    | 0.12 (0.87)    | 0.11 (0.96)     | 0.24 (1.05)  | 0.44 (1.12) ** |
|                        | Humiliation                 | Low (BT)  | 105 | -0.07 (0.97)  | 0.01 (0.99)    | -0.05 (1.02)   | 0.10 (1.12)    | 0.09 (1.00)  | 0.04 (0.98)   | 0.12 (0.94)     | -0.11 (0.81)    | 0.11 (0.98)    | 0.29 (0.88)      | 0.11 (1.00)    | 0.00 (0.89)    | 0.29 (1.12)     | 0.05 (1.18)  | 0.10 (0.96)    |
|                        |                             | High (TT) | 106 | -0.11 (0.84)  | 0.01 (1.04)    | 0.06 (1.11)    | -0.05 (0.84)   | 0.00 (1.01)  | 0.04 (0.95)   | -0.03 (0.95)    | 0.07 (1.02)     | -0.19 (0.89)   | -0.01 (1.05) †   | -0.25 (0.91)   | 0.09 (0.85)    | -0.22 (0.85) *  | 0.01 (0.94)  | 0.15 (1.10)    |
|                        | Entrapment                  | Low (BT)  | 106 | -0.01 (1.00)  | -0.04 (0.91)   | -0.02 (0.87)   | 0.04 (0.97)    | -0.02 (1.14) | -0.06 (0.93)  | -0.13 (0.77)    | -0.20 (0.96)    | 0.20 (1.03)    | 0.21 (0.89)      | 0.17 (1.04)    | 0.17 (1.01)    | 0.13 (1.33)     | -0.06 (0.86) | 0.01 (1.11)    |
|                        |                             | High (TT) | 106 | 0.02 (1.10)   | 0.13 (1.09)    | 0.16 (1.20)    | 0.08 (1.09)    | 0.02 (0.85)  | 0.04 (0.97)   | 0.01 (0.96)     | 0.11 (0.96) *   | 0.04 (0.90)    | 0.06 (1.03)      | 0.02 (0.92)    | 0.10 (0.79)    | 0.01 (0.82)     | 0.02 (0.96)  | 0.18 (1.01)    |
|                        | Role Change/Disruption      | Low (BT)  | 105 | -0.01 (1.01)  | 0.14 (0.96)    | -0.08 (0.94)   | 0.01 (1.08)    | -0.01 (1.18) | -0.08 (0.91)  | -0.02 (1.07)    | -0.06 (0.84)    | 0.07 (0.98)    | 0.47 (1.03)      | 0.12 (0.91)    | -0.05 (0.91)   | 0.25 (1.03)     | -0.23 (0.99) | -0.21 (0.69)   |
|                        |                             | High (TT) | 105 | 0.04 (1.09)   | 0.02 (1.03)    | 0.15 (1.07)    | 0.18 (1.00)    | 0.03 (0.86)  | 0.17 (1.14) † | -0.01 (1.16)    | 0.16 (1.23)     | 0.04 (1.00)    | -0.22 (0.92) *** | 0.00 (1.02)    | 0.11 (0.82)    | 0.03 (0.84)     | 0.21 (1.11)  | -0.03 (0.84)   |

TT = Top tertile, BT = Bottom tertile; † p < 0.10; \* p < 0.05; \*\* p < 0.01; \*\*\* p < 0.001; † unadjusted

Vertical lines group similar variables: interleukin (IL)-1β, IL-6, IL-8, tumor necrosis factor (TNF)α, C-reactive protein (CRP), are all markers of inflammation, fetuin A (FA), serum amyloid P (SAP), and carotid intima media thickness (CIMT) are cardiovascular risk factors, and white blood cells (WBC), red blood cells (RBC), Neutrophils, Lymphocytes, Monocytes, Eosinophils, and Basophils are blood cell counts that were analyzed together.

Vertical lines group similar variables: interleukin (IL)-1β, IL-6, IL-8, tumor necrosis factor (TNF)α, C-reactive protein (CRP), are all markers of inflammation, fetuin A (FA), serum amyloid P (SAP), and carotid intima media thickness (CIMT) are cardiovascular risk factors, and white blood cells (WBC), red blood cells (RBC), Neutrophils, Lymphocytes, Monocytes, Eosinophils, and Basophils are blood cell counts that were analyzed together.
