# Supplementary material
Source: PubMed Central journal article supplement (PMC7004871)
Supplement: NIHMS1535166-supplement-Supplemental_Data_File__doc__pdf__etc___5.pdf [file NIHMS1535166-supplement-Supplemental_Data_File__doc__pdf__etc___5.pdf]

SDC5. Results from ANCOVA

| Stressor     | Biomarker | N   | Bottom Tertile | Middle Tertile | High Tertile | ANCOVA |                    |                   |       | Monotonic |
|--------------|-----------|-----|----------------|----------------|--------------|--------|--------------------|-------------------|-------|-----------|
|              |           |     | Mean (SD)      | Mean (SD)      | Mean (SD)    | F      | DF, between groups | DF, within groups | p     |           |
| Stress       | IL8       | 317 | -0.15 (0.86)   | 0.02 (1.02)    | 0.13 (1.10)  | 4.37   | 1                  | 208               | 0.038 | Yes       |
| Stress       | RBC       | 317 | 0.36 (0.83)    | 0.24 (0.77)    | -0.21 (1.22) | 3.53   | 1                  | 208               | 0.069 | Yes       |
| Early        | WBC       | 317 | 0.24 (1.08)    | 0.15 (1.12)    | -0.30 (0.75) | 2.95   | 1                  | 208               | 0.096 | Yes       |
| Early        | RBC       | 317 | 0.56 (0.75)    | 0.07 (0.77)    | -0.14 (1.21) | 4.36   | 1                  | 208               | 0.045 | Yes       |
| Early        | Neut      | 317 | 0.26 (1.04)    | 0.08 (1.22)    | -0.29 (0.78) | 3.27   | 1                  | 208               | 0.080 | Yes       |
| Early        | Mono      | 317 | 0.35 (1.29)    | 0.07 (0.99)    | -0.31 (0.78) | 3.41   | 1                  | 208               | 0.074 | Yes       |
| Adult        | IL8       | 317 | -0.10 (0.91)   | -0.06 (0.96)   | 0.16 (1.11)  | 3.54   | 1                  | 208               | 0.061 | Yes       |
| Adult        | CIMT      | 310 | -0.18 (0.85)   | 0.10 (1.13)    | 0.07 (1.00)  | 4.50   | 1                  | 207               | 0.035 | No        |
| Adult        | RBC       | 317 | 0.47 (0.75)    | -0.01 (0.99)   | -0.11 (1.13) | 5.02   | 1                  | 208               | 0.032 | Yes       |
| Adult        | EO        | 317 | -0.38 (0.84)   | 0.30 (1.04)    | 0.24 (1.11)  | 3.79   | 1                  | 208               | 0.060 | No        |
| Adult        | BASO      | 317 | -0.28 (0.78)   | 0.01 (1.43)    | 0.25 (0.98)  | 3.13   | 1                  | 208               | 0.086 | Yes       |
| Housing      | IL6       | 317 | 0.14 (0.94)    | 0.03 (1.06)    | -0.11 (0.94) | 3.57   | 1                  | 208               | 0.060 | Yes       |
| Housing      | TNFa      | 317 | 0.20 (1.12)    | 0.06 (1.00)    | -0.05 (0.79) | 3.61   | 1                  | 208               | 0.059 | Yes       |
| Housing      | CIMT      | 310 | -0.24 (0.76)   | 0.02 (0.98)    | 0.19 (1.18)  | 9.97   | 1                  | 202               | 0.002 | Yes       |
| Education    | IL6       | 317 | 0.14 (1.03)    | 0.03 (0.96)    | -0.11 (0.95) | 3.37   | 1                  | 208               | 0.068 | Yes       |
| Education    | TNFa      | 317 | 0.39 (1.04)    | -0.28 (0.87)   | 0.10 (0.92)  | 4.66   | 1                  | 208               | 0.032 | No        |
| Education    | CIMT      | 310 | -0.29 (0.84)   | 0.11 (0.84)    | 0.15 (1.22)  | 9.53   | 1                  | 198               | 0.002 | Yes       |
| Work         | TNFa      | 317 | 0.18 (1.06)    | 0.08 (0.93)    | -0.06 (0.93) | 3.11   | 1                  | 208               | 0.079 | Yes       |
| Work         | SAP       | 264 | -0.10 (0.95)   | -0.13 (0.81)   | 0.22 (1.21)  | 4.16   | 1                  | 190               | 0.043 | No        |
| Work         | CIMT      | 310 | -0.24 (0.94)   | 0.02 (0.92)    | 0.20 (1.09)  | 10.43  | 1                  | 207               | 0.001 | Yes       |
| Health       | WBC       | 317 | -0.91 (0.80)   | 0.08 (1.07)    | -0.01 (0.81) | 3.04   | 1                  | 208               | 0.099 | No        |
| Marital      | RBC       | 317 | 0.49 (0.70)    | 0.26 (1.03)    | -0.31 (1.07) | 7.87   | 1                  | 208               | 0.008 | Yes       |
| Reproductive | IL6       | 317 | 0.14 (1.04)    | 0.03 (0.91)    | -0.11 (0.99) | 3.06   | 1                  | 208               | 0.082 | Yes       |
| Reproductive | CIMT      | 310 | -0.38 (0.64)   | 0.12 (0.92)    | 0.20 (1.24)  | 18.42  | 1                  | 198               | 0.000 | Yes       |
| Financial    | IL1b      | 317 | -0.16 (0.85)   | 0.01 (0.94)    | 0.15 (1.17)  | 5.05   | 1                  | 208               | 0.026 | Yes       |
| Financial    | IL8       | 317 | -0.16 (0.87)   | -0.01 (0.82)   | 0.17 (1.23)  | 5.16   | 1                  | 208               | 0.024 | Yes       |
| Financial    | CIMT      | 310 | -0.21 (0.73)   | 0.06 (1.13)    | 0.13 (1.08)  | 7.83   | 1                  | 206               | 0.006 | Yes       |
| Legal        | CIMT      | 310 | -0.32 (0.85)   | 0.05 (0.80)    | 0.22 (1.23)  | 13.83  | 1                  | 198               | 0.000 | Yes       |
| Death        | SAP       | 264 | -0.13 (0.89)   | -0.12 (0.91)   | 0.25 (1.21)  | 6.15   | 1                  | 180               | 0.014 | Yes       |
| Death        | Lymph     | 317 | -1.02 (1.03)   | 0.32 (0.78)    | -0.03 (0.91) | 5.57   | 1                  | 208               | 0.028 | No        |
| Death        | BASO      | 317 | -0.87 (0.84)   | 0.17 (1.17)    | 0.09 (0.85)  | 7.08   | 1                  | 208               | 0.014 | No        |
| LifeThreat   | IL8       | 317 | -0.13 (0.93)   | -0.03 (0.82)   | 0.16 (1.19)  | 4.09   | 1                  | 208               | 0.044 | Yes       |
| LifeThreat   | TNFa      | 317 | -0.05 (0.99)   | 0.08 (0.91)    | 0.19 (1.04)  | 3.10   | 1                  | 208               | 0.080 | Yes       |
| LifeThreat   | SAP       | 264 | 0.14 (1.16)    | -0.07 (0.92)   | -0.13 (0.88) | 3.11   | 1                  | 188               | 0.080 | Yes       |
| Possessions  | IL8       | 317 | 0.19 (1.13)    | -0.14 (0.98)   | -0.04 (0.85) | 2.75   | 1                  | 208               | 0.099 | No        |
| Possessions  | TNFa      | 317 | 0.33 (1.04)    | -0.20 (0.95)   | 0.08 (0.89)  | 3.69   | 1                  | 208               | 0.056 | No        |
| Possessions  | SAP       | 264 | -0.28 (0.88)   | 0.29 (1.11)    | -0.03 (0.92) | 2.90   | 1                  | 153               | 0.091 | No        |
| Possessions  | CIMT      | 310 | -0.30 (0.86)   | 0.06 (0.85)    | 0.20 (1.20)  | 11.76  | 1                  | 197               | 0.001 | Yes       |
| Loss         | WBC       | 317 | 0.39 (0.98)    | -0.52 (1.26)   | -0.14 (0.64) | 4.41   | 1                  | 208               | 0.043 | No        |
| Loss         | RBC       | 317 | 0.54 (0.59)    | -0.37 (1.07)   | -0.05 (1.14) | 5.53   | 1                  | 208               | 0.024 | No        |
| Loss         | Neut      | 317 | 0.37 (0.97)    | -0.49 (1.20)   | -0.18 (0.85) | 3.97   | 1                  | 208               | 0.054 | No        |
| Danger       | EO        | 317 | -0.46 (0.56)   | -0.10 (0.97)   | 0.42 (1.16)  | 6.93   | 1                  | 208               | 0.013 | Yes       |
| Danger       | BASO      | 317 | -0.74 (0.67)   | -0.15 (0.70)   | 0.52 (1.17)  | 12.98  | 1                  | 208               | 0.001 | Yes       |
| Humiliation  | RBC       | 317 | 0.55 (0.76)    | -0.07 (0.92)   | -0.07 (1.13) | 4.48   | 1                  | 208               | 0.042 | No        |
| Humiliation  | Mono      | 317 | 0.30 (1.31)    | 0.18 (0.90)    | -0.42 (0.72) | 4.19   | 1                  | 208               | 0.049 | Yes       |
| Entrapment   | CIMT      | 310 | -0.20 (0.96)   | 0.06 (1.06)    | 0.11 (0.96)  | 5.52   | 1                  | 203               | 0.020 | Yes       |
| Entrapment   | Neut      | 317 | 0.41 (1.04)    | -0.41 (0.92)   | -0.17 (0.96) | 2.97   | 1                  | 208               | 0.094 | No        |
| Role         | FA        | 264 | -0.08 (0.91)   | 0.01 (1.01)    | 0.17 (1.14)  | 2.75   | 1                  | 180               | 0.099 | Yes       |
